# Supplementary material for: A gelatin-based feed for precise and non-invasive drug delivery to adult zebrafish
Source: Oxford University Press journal article supplement (doi:10.1242/jeb.245186), 2023-01-06
Supplement: jeb245186supp.pdf [file jeb245186supp.pdf]

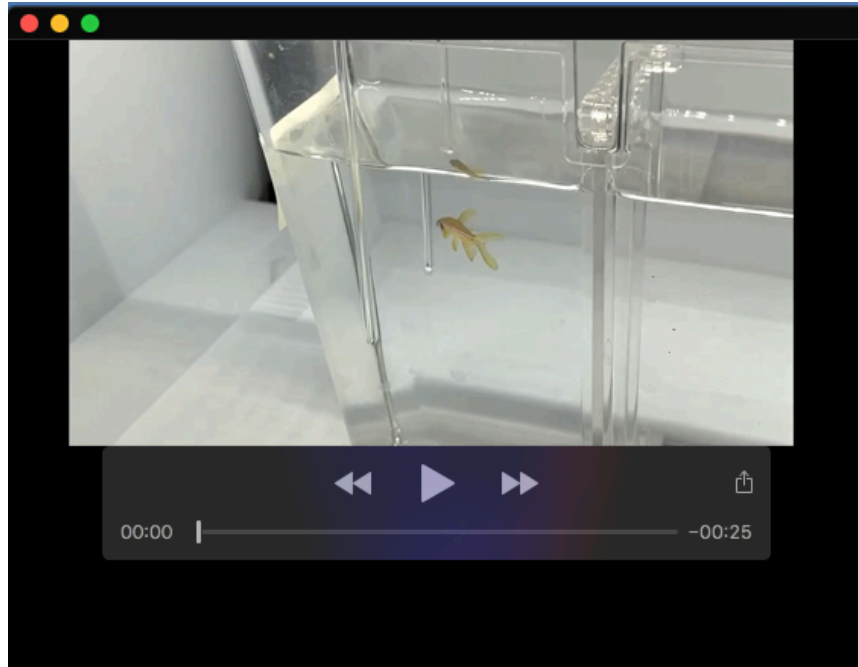

**Movie 1.** Video of TL zebrafish rapidly consuming the gelatin-based feed.
